# Supplementary material for: The Effects of Genetic Relatedness on the Preterm Infant Gut Microbiota
Source: MDPI journal article supplement (doi:10.3390/microorganisms9020278), 2021-01-29

# Frequency distribution and correlation matrix of transformed clinical and alpha diversity variables

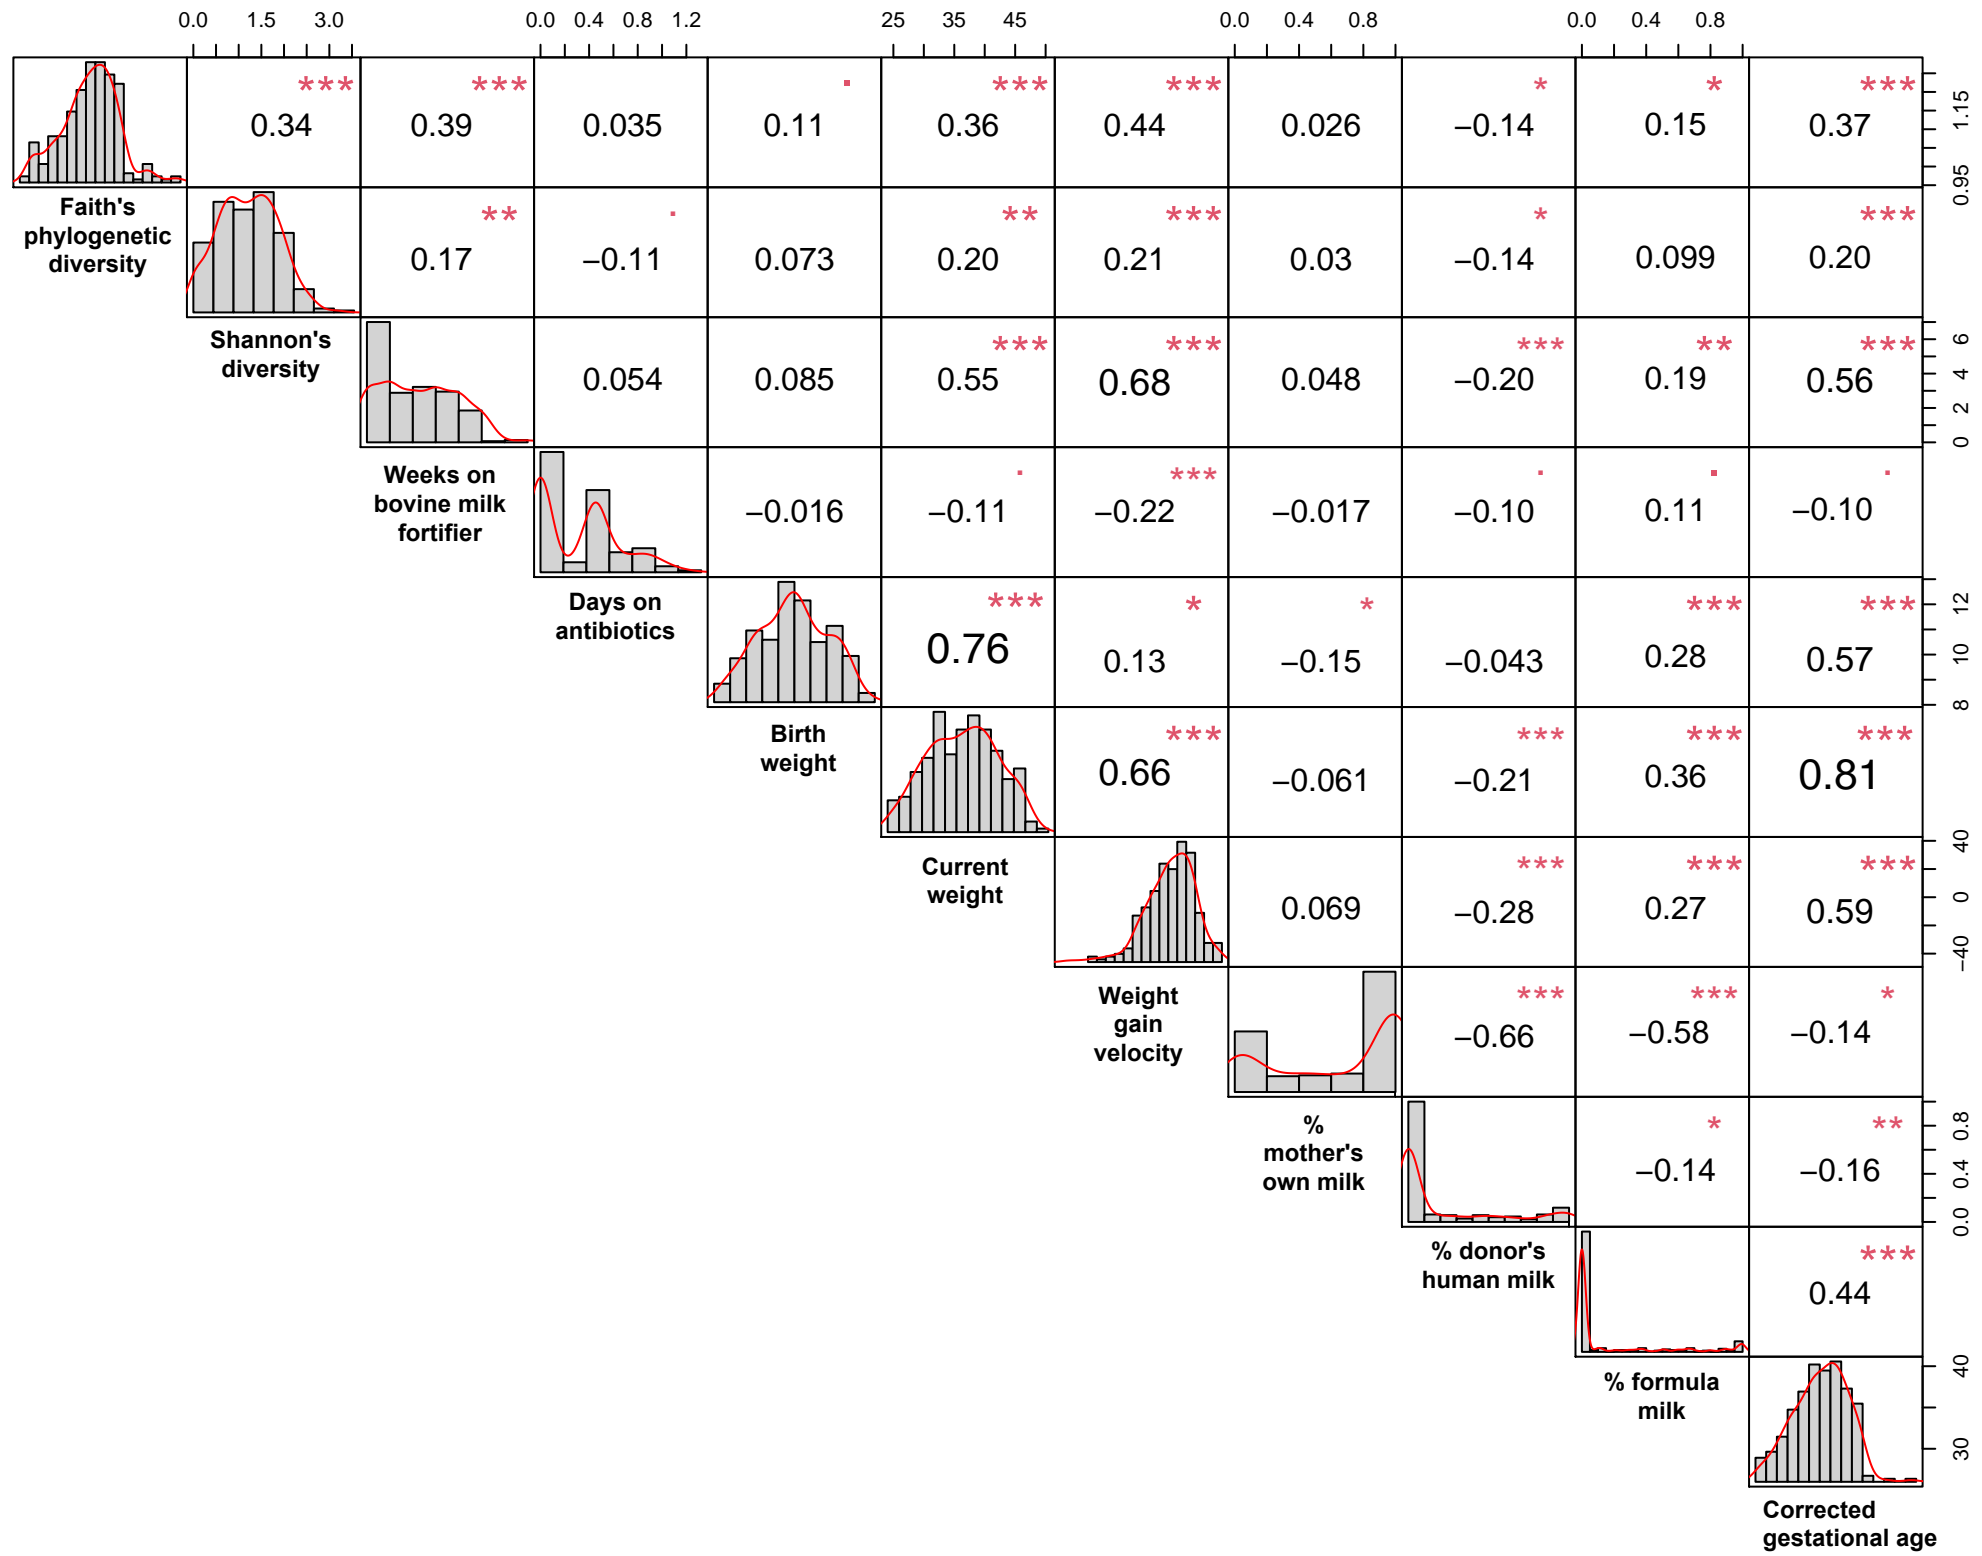

Supplement: s1 [file s1]
